1     Intrinsic dynamics enhance decodability of  
2     neurons in a model of avian auditory cortex

3             Margot C. Bjoring<sup>1</sup> and C. Daniel Meliza<sup>1,2</sup>

4             <sup>1</sup>Department of Psychology, University of Virginia,  
5                             Charlottesville, VA

6             <sup>2</sup>Neuroscience Graduate Program, University of Virginia,  
7                             Charlottesville, VA

8                             January 16, 2018

## 9 **Abstract**

10 Birdsong is a complex vocalization that bears important similarities to  
11 human speech. Critical to recognizing speech or birdsong is the ability to  
12 discriminate between similar sequences of sound that may carry different  
13 meanings. The caudal mesopallium (CM) is a secondary area in the  
14 auditory system of songbirds that is a potential site for song identification,  
15 displaying both between-category selectivity and within-category tolerance  
16 to conspecific song. Electrophysiological studies of CM have identified a  
17 population of neurons with intrinsically phasic firing patterns in addition to  
18 the more typical tonic and fast-spiking neurons. The function of these  
19 phasic neurons in processing spectrotemporally complex conspecific  
20 vocalizations is not known. We investigated the auditory response  
21 properties of phasic and tonic neurons using computational modeling with  
22 particular focus on the selectivity and entropy of the simulated responses to  
23 birdsong. When biophysical models of phasic and tonic neurons were  
24 presented with identical inputs, the phasic models were more selective  
25 among syllables and more robust to noise-induced variability, potentially  
26 providing an advantage for song identification. Additionally, the overall  
27 responsiveness of a model to the stimulus set determined which decoding  
28 metric better captured the coding strategy of the model's response. The  
29 relationships between measures of decodability found in the model  
30 simulations are consistent with extracellular data from zebra finch CM.

## 31 **Introduction**

## 32 **Auditory Processing**

33 The auditory processing of speech presents a challenging problem that the  
34 human auditory system solves with ease. Noisy acoustic environments and  
35 speaker-to-speaker variability are just a few of the complications involved in  
36 decoding a speech stream. Mammalian models of audition have uncovered  
37 key features of auditory cortex such as tonotopic organization [1],  
38 feedforward inhibition to sharpen the fine temporal structures of sound [2],  
39 and even evidence for harmonic connections across octaves [3]. The ability  
40 to extend rodent models to the processing of vocalizations with the  
41 temporal and spectral complexity of speech, however, is limited due to the  
42 relatively simple and innate vocalizations produced by rodents. In fact,  
43 with the exception of cetaceans and bats, mammalian vocalizations do not  
44 require auditory experience to produce. The songbird (*Passeriformes*),  
45 while a very distant relative of humans and possessing a different vocal  
46 apparatus called a syrinx, nevertheless displays many of the vocal traits  
47 characteristic of human speech, including complex, learned vocalizations.

## 48 **Songbird models**

49 Songbirds have generated substantial interest as a model for studying the  
50 vocal production and auditory processing of speech. Singing is used to  
51 attract mates, strengthen pair bonds, and defend territory [4]. Although

52 many songbirds inherit a template of their species-appropriate song, which  
53 may help juveniles identify suitable tutors, the songs themselves must be  
54 learned by memorizing the song of an adult tutor and subsequently  
55 practicing vocalizations in an attempt to match the memorized tutor  
56 song [5]. In zebra finches (*Taeniopygia guttata*), a popular model for  
57 studying language, juveniles deafened prior to song exposure or raised in  
58 isolation from a tutor fail to acquire an organized song [6], and juveniles  
59 raised with a heterospecific tutor will often attempt to incorporate the  
60 content of the tutor's song into their inherent template [7].

61 Like humans, zebra finches exhibit a critical period for acquiring song,  
62 from around 15 days post-hatch (dph) when brainstem auditory responses  
63 mature [8] to 60-90 dph [5]. A number of factors can extend the closure of  
64 the critical period, including isolation from a suitable tutor [9]. Zebra  
65 finches learn a single song, and after the closure of the critical period, this  
66 song is crystalized and will not change throughout their life [5]. Other  
67 songbirds, like European starlings (*Sturnus vulgaris*), are open-ended  
68 learners who can add to their repertoire of songs even in adulthood [10].

69 The development of song production is the most studied aspect of the  
70 critical period, but there is also concomitant development of the auditory  
71 system as juveniles learn to hear and identify song. In humans, infants go  
72 through well-defined stages of auditory learning including statistical  
73 learning of sound patterns leading to categorical perception of  
74 language-specific sounds and reduced discrimination of sounds not in their

75 language [5]. Research in starlings has shown that they are capable of  
76 statistical learning of regularities in continuous sound streams [11].  
77 Evidence for categorical perception has been shown for conspecific song  
78 notes in zebra finches [12] and for learned vowel sounds in starlings [13].  
79 Auditory experience in development also influences the responses of  
80 auditory neurons to song in adulthood [14]. Further research will be  
81 necessary to fully explain the developmental stages of the auditory system  
82 in juvenile songbirds.

### 83 **Songbird auditory pathways**

84 The songbird auditory system from the cochlea to the auditory thalamus  
85 (nucleus ovoidalis; Ov) is highly consistent with the mammalian auditory  
86 pathway [15]. The avian brain lacks a six-layered cortex; the pallium is  
87 instead organized into clusters of neurons forming nuclei. The homology of  
88 the pallial auditory regions to mammalian auditory cortex has been a  
89 matter of debate, although recent studies have identified genetic and  
90 functional similarities. Dugas-Ford *et al.* (2012) [16] found conserved cell  
91 types among mammals, birds, and reptiles for the layer 4 input and layer 5  
92 output cells of the cortex despite the different architecture of avian and  
93 reptilian brains. There is evidence of laminar and columnar organization  
94 within the avian auditory forebrain along the dorsorostral-ventrocaudal  
95 plane [17]. The avian auditory pallium also shows a marked preference for  
96 natural stimuli such as birdsong over artificial stimuli like white noise and

97 pure tones. The mesencephalicus lateralis dorsalis (MLd), a midbrain  
98 auditory nucleus akin to the inferior colliculus in mammals, responds  
99 robustly to pure-tone stimulation [18], but at the level of the auditory  
100 forebrain the preference for natural sounds or synthetic sounds with  
101 statistics that mimic natural sounds emerges [19] [20]. The mammalian  
102 auditory system shows a similar emergence of a preference for natural  
103 stimuli from midbrain to cortex [21].

104 Field L2a is the primary thalamorecipient area in the avian auditory  
105 forebrain, with downstream areas L1, L3, and L2b. These areas have  
106 reciprocal connections with each other and also with the higher-order areas  
107 caudomedial nidopallium (NCM) and caudal mesopallium (CM) [22].  
108 Although all of these areas communicate either directly or indirectly with  
109 each other, two primary streams emerge from Field L. L3 to NCM is one,  
110 and L1 and L2b to CM is the other. More research is needed to determine  
111 the functional differences between these two streams of information. NCM  
112 and CM are the highest areas in the songbird auditory pathway and may be  
113 analogous to supragranular layers of A1 or secondary auditory areas in  
114 mammals [23]. Given their position in the auditory hierarchy, it is likely  
115 that these areas are responsible for song learning and recognition, and  
116 recent research has supported this idea.

117 NCM is a potential location for the memory of the tutor song that  
118 juvenile birds base their own songs on. Immediate early gene expression in  
119 NCM when zebra finches are presented with their tutor song is correlated

120 with the degree of copying between the bird's own song and the tutor  
121 song [24]. The strength of song learning is also correlated with the  
122 familiarity of the tutor song in NCM as measured by the rate of  
123 accommodation of a neural response to auditory stimulation [25]. CM is  
124 not involved in the tutor song memory but does play a role in the learning  
125 of other conspecific songs. Jeanne *et al.* (2011) [26] showed that learned  
126 songs are more effectively encoded by CM neurons than novel songs and  
127 that rewarded songs were better encoded than unrewarded songs, indicating  
128 not just a bias toward learned songs but toward behaviorally-relevant  
129 songs. Meliza and Margoliash (2012) [27] found that the response to  
130 within-song variability is an important difference between NCM and CM;  
131 NCM shows sensitivity to performance-to-performance differences in a song,  
132 while CM is tolerant to these differences.

### 133 **Current study and its motivation**

134 The tolerance of CM for within-song variability and its preferential  
135 response to behaviorally relevant stimuli make it a potential site for the  
136 decoding of song identity. In human language, there are meaningful  
137 differences between words that can completely change the meaning of an  
138 utterance as well as non-meaningful differences in the pronunciation of a  
139 single word. The same is true of birdsong: there are variations between  
140 performances of a song that a bird must recognize as coding for the same  
141 identity, and there are also birds with highly similar songs (e.g., siblings or

142 a tutor and pupil). Based on its position in the auditory system and its  
143 response properties, CM is well positioned to produce this kind of  
144 discrimination. The ultimate goal of a birdsong model of language is to  
145 explain not only what higher-order areas do but how they do it, and a  
146 mechanistic explanation must start at the cell level.

147       Electrophysiological studies of the broad-spiking, putatively excitatory,  
148 cell class within CM by Chen and Meliza (2017) [28] has revealed three  
149 distinct cell types within this class based on response properties to current  
150 stimulation: tonic, intermediate, and phasic. Tonic neurons are similar to  
151 the regular-spiking neurons seen in auditory cortex but show less regularity  
152 and higher adaptation rates. Phasic neurons fire only once or a few times  
153 regardless of the level and extent of stimulation and are the result of a  
154 4AP-sensitive low-threshold potassium current. This type of firing pattern  
155 is not seen in adult mammalian auditory cortex, though it has been  
156 observed in juveniles [29] and lower levels of the mammalian auditory  
157 system [30]. Intermediate neurons respond tonically at some levels of  
158 stimulation and phasically at others.

159       The presence of a phasically responding neuron in an area of the avian  
160 auditory forebrain involved in decoding song identity has interesting  
161 implications about the role such neurons might play in addressing some of  
162 the complications of auditory processing like noisy acoustic environments  
163 and song-to-song variability. In this study, we explore the functional  
164 significance of phasic neurons in CM using a modeling approach and test



165 the hypothesis that phasic neurons may possess an encoding advantage over  
166 tonic neurons that make them more informative and less affected by the  
167 presence of noise, thereby enhancing the ability of CM to determine the  
168 identity of a song stimulus. We then assess the validity of our model's  
169 predictions by comparing the results of our model to extracellular data  
170 from zebra finch CM. Identifying the functional roles of the cell types of  
171 CM is the first step toward understanding the circuit and being able to  
172 model the computations required to go from sequences of frequencies to an  
173 identifiable, meaningful vocalization.

## 174 **Methods**

### 175 **Animals**

176 All animal use was performed in accordance with the Institutional Animal  
177 Care and Use Committee of the University of Virginia. Adult zebra finches  
178 were obtained from the University of Virginia breeding colony. Thirty male  
179 zebra finches provided song recordings that were used as stimuli in the  
180 simulation experiments. During recording, zebra finches were housed in a  
181 soundproof auditory isolation box (Eckel Industries) with *ad libitum* food  
182 and water and were kept on a 16:8h light:dark schedule. A mirror was  
183 added to the box to stimulate singing. A typical recording session lasted  
184 2-3 days. Birds were returned to the main colony after song recording.

## 185 **Simulation**

186 *Neuron model.* The model used in this study is a conductance-based,  
187 single-compartment model of CM neurons. The model, based on the ventral  
188 cochlear nucleus model of Rothman and Manis (2003) [31], relates the  
189 voltage dynamics of a single neuron to currents associated with ion  
190 channels. The model used in this study includes 4 voltage-gated potassium  
191 and sodium currents, a leak current, and a hyperpolarization activated ion  
192 current [28]. The model neuron exhibits a depolarization block to strong  
193 currents and a sustained response to weak currents. The model parameter  
194 values follow Rothman and Manis (2003) [31] with a few adjustments for  
195 resting potential and spike threshold for CM neurons. The calculations  
196 presented here used the consensus model parameters from Chen and Meliza  
197 (2017) [28] for tonic and phasic cells.

198 *Auditory response simulation.* To simulate an auditory response,  
199  $I_{stim}(t)$  becomes the convolution of a spectrotemporal receptive field (RF)  
200 with a spectrogram of an auditory stimulus.  $I_{noise}(t)$  is randomly generated  
201 pink noise ( $1/f$  distribution) low-pass filtered at 100Hz and scaled relative  
202 to the signal to achieve a set signal-to-noise ratio (SNR).

203 Auditory stimuli are 30 zebra finch songs recorded from our colony.  
204 All songs were cut to 2.025s long with 50ms of silence at the beginning to  
205 pad the convolution, high-pass filtered at 500Hz with a 4th order  
206 Butterworth filter, and scaled to a consistent RMS amplitude. Start and  
207 end times of syllables were identified by visual inspection. Repeated

208 syllables were grouped in the decoding analyses.

RFs were constructed with a Gabor filter based on Woolley *et al.* (2009) [32]:

$$\begin{aligned}\text{RF}(t, f) &= H(t) \cdot G(f), \\ H(t) &= e^{-0.5[(t-t_0)/\sigma_t]^2} \cdot \cos(2\pi \cdot \Omega_t(t - t_0) + P_t), \\ G(f) &= e^{-0.5[(f-f_0)/\sigma_f]^2} \cdot \cos(2\pi \cdot \Omega_f(f - f_0)),\end{aligned}$$

209 where  $H$  is the temporal dimension of the RF,  $G$  is the spectral dimension  
210 of the RF,  $t_0$  is the latency,  $f_0$  is the peak frequency,  $\sigma_t$  and  $\sigma_f$  are the  
211 temporal and spectral bandwidths,  $\Omega_t$  and  $\Omega_f$  are the temporal and spectral  
212 modulation frequencies, and  $P_t$  is the temporal phase. Parameter values  
213 were randomly drawn from distributions set so as to match the modulation  
214 transfer function (MTF) of the RF ensemble to the MTF of zebra finch  
215 song [33] [32] (Figure 1). The integral of each RF was normalized to one.

216 In the context of this simulation, a model neuron is a combination of  
217 one RF and one model dynamic (phasic or tonic). 60 RFs were generated  
218 to produce paired phasic and tonic simulations, and 15 of the RFs were  
219 excluded due to MTF values outside the reported distribution of RFs in  
220 zebra finch neurons [32] ( $N = 90$  neurons or 45 pairs). The 30 zebra finch  
221 songs were presented 10 times each to each neuron with random pink noise  
222 producing trial-to-trial variability. Pink noise sets were identical between  
223 paired phasic and tonic neurons. The total amplitude of the convolution

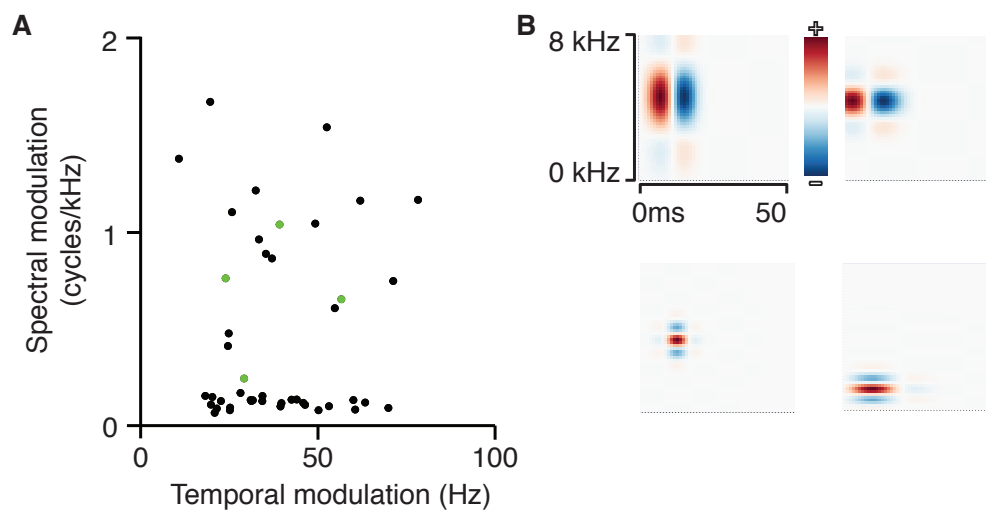

Figure 1: Receptive field parameter distributions. **A**, Combinations of the temporal modulations and spectral modulation parameters used to construct the RFs used in this study. The parameter values were drawn randomly from parameter distributions inferred from experimental data. Values outside the range of reported RFs (temporal modulation  $> 100\text{Hz}$  or spectral modulation  $> 2$  cycles/kHz) were excluded. The points colored in green are the RFs shown in **B**. **B**, Examples of 4 of the 45 RFs used in this study.

224 was normalized by the bandwidth of the RF on the frequency axis ( $\sigma_f$ ) to  
225 account for the differences in amplitudes between narrowband and  
226 broadband RFs. The output of the model was a simulated voltage trace  
227 from which spike times were extracted.

228 *Data analysis.* Spike times were extracted from the simulated  
229 responses. The classification analysis was performed by computing the van  
230 Rossum distance [34] (as implemented in neo:  
231 <http://neo.readthedocs.io/en/0.5.2/>) between every pair of spike trains for  
232 a model neuron ( $n = 300$ ). We considered multiple time-scales for the  $\tau$   
233 parameter of the van Rossum distance from 5 to 45ms. A  $k$ -means  
234 clustering algorithm assigned spike trains to clusters based on their  
235 proximity in high-dimensional space. Cluster identity was assigned by a  
236 voting scheme as described in Schneider and Woolley (2010) [35] with each  
237 spike train casting a vote for its corresponding song. The proportion of  
238 correctly clustered spikes for each neuron determined its percent correct  
239 value.

We calculated spike rate,  $r_{i,j}$ , as the number of spikes evoked by syllable  $i$  in trial  $j$ , divided by the duration of the syllable. Selectivity was quantified using activity fraction [36] [27], a nonparametric index defined as:

$$A = \frac{1 - (\sum r_i / N)^2 / \sum r_i^2 / N}{1 - 1/N}$$

240 where  $r_i$  is the rate for syllable  $i$  averaged across trials, and  $N$  is the total

241 number of syllables.

242 Mutual information (MI), response entropy, and noise entropy were  
243 calculated following Jeanne et al. (2011) [26]. Response rates were  
244 discretized into 15 bins between 0 Hz and the maximum rate of the model.  
245 Response (total) entropy was calculated as  $H(R) = -\sum p(r) \log_2 p(r)$ , noise  
246 entropy as  $H(R|S) = -\sum p(s) \sum p(r|s) \log_2 p(r|s)$ , and mutual information as  
247  $I(R; S) = H(R) - H(R|S)$ , where  $r$  is the rate and  $s$  is the syllable.  
248 Because of the large number of stimuli and trials, and because we were  
249 interested in differences between models presented with exactly the same  
250 stimuli, we did not correct entropy or MI for sample size bias.

## 251 **Extracellular data**

252 Analyses based on extracellular data were performed on the publicly  
253 available dataset from Theunissen *et al.* [37] on CRCNS.org. Neural  
254 recordings were collected from adult male zebra finches as described in Gill  
255 *et al.* [38]. Only cells from CM stimulated with conspecific song were used  
256 these analyses ( $n = 37$ ). Selectivity and MI analyses were performed as  
257 described above with the exception that 10 response bins were used for MI  
258 instead of 15 due to a smaller stimulus set.

## 259 Results

260 To explore the consequences of the intrinsic membrane properties giving  
261 rise to phasic and tonic response dynamics in terms of the functional role of  
262 the neurons in the auditory processing of song, we use the neuron model  
263 described in Chen and Meliza (2017) [28], which replicates the observed  
264 phasic and tonic behaviors through the adjustment of the low-threshold  
265 potassium current parameter of the model. Auditory response is simulated  
266 by setting the current stimulation parameter ( $I_{stim}$ ) to the normalized  
267 convolution of the spectrogram of a zebra finch song and a receptive field  
268 constructed from Gabor filters (Figure 2A). Variability in the response is  
269 achieved by adding pink noise ( $1/f$  spectrum) to the convolution with a  
270 signal-to-noise ratio of 4.

271 Input-matched phasic and tonic neurons produce distinct spiking  
272 responses. In general, phasic neurons show reduced variation in spike times  
273 and spike numbers to a given syllable of a song (Figure 2B-C). The  
274 increased consistency of the responses of phasic neurons indicates an  
275 advantage for the decodability of the neural signal. We quantified this  
276 effect using several different measures of coding efficiency.

277 *Temporal-based coding.* A temporal code uses the pattern of spike  
278 times to encode the identity of a signal. An efficient temporal code  
279 represents different stimuli with distinguishable patterns of spikes and has  
280 high temporal precision across multiple trials of the same stimulus. Because

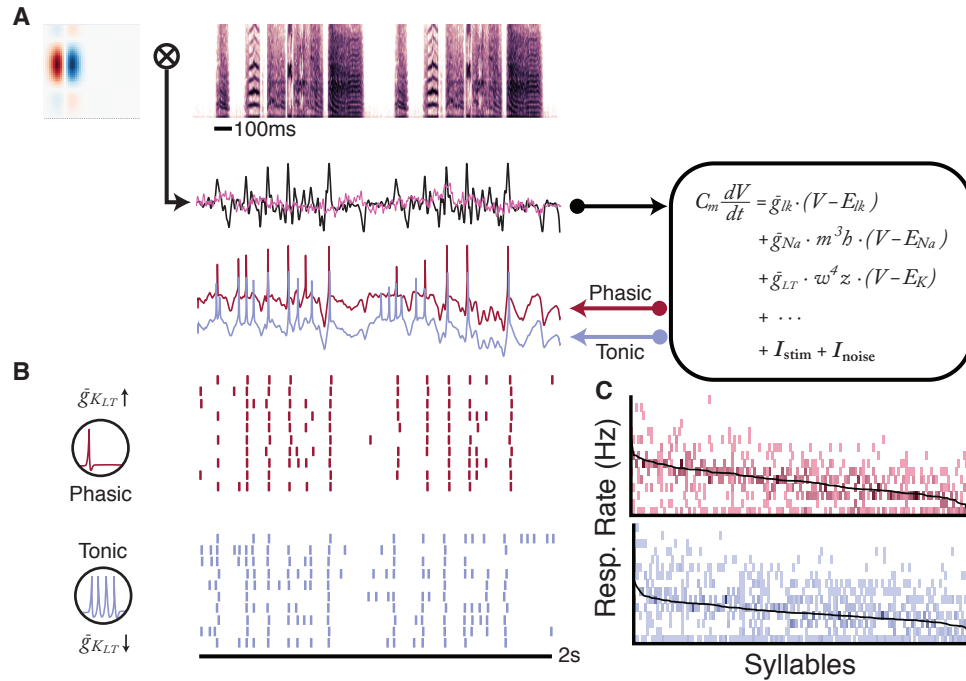

Figure 2: Data simulation and analysis pipeline. **A**, Auditory responses can be simulated through the convolution of a spectrotemporal receptive field (upper left) with a spectrogram (upper right) of an auditory stimulus, in this case a zebra finch song. The resulting convolution (black line) provides the driving current ( $I_{stim}$ ) of the biophysical model used in this study (right). Low-pass filtered pink noise ( $I_{noise}$ ) adds variability to the driving current. The output of the model is a simulated voltage trace (lower left) which can have either phasic (red line) or tonic (blue line) response properties depending on the conductance of a low-threshold potassium channel parameter ( $g_{K_{LT}}$ : 0 nS or 100 nS for tonic and phasic respectively). **B**, Raster plots of the full simulation for the stimulus-RF pair in **A** across 10 trials for phasic (red) and tonic (blue) model. The example demonstrates the increased variability in spike number and decreased temporal precision for the tonic model as compared to the phasic model. **C**, Full response distribution for the example neuron. Response rates are calculated per syllable in each song and divided into 15 bins. The black line indicates the average response rate across the syllables and the spread of response rate bins around that line show the trial-to-trial variability of the response rate.



281 the timescale used in the decoding of a temporal code substantially affects  
282 the results, we considered multiple timescales when analyzing the temporal  
283 decodability of the simulated neural responses. Figure 3 shows the results  
284 of a classification analysis using a  $k$ -means clustering approach on the van  
285 Rossum distance of each pair of spike trains, calculated at multiple time  
286 constants.

287       Although both groups perform well above chance, the phasic neuron  
288 models show clear separation from tonic models in terms of discriminability  
289 of temporal codes at all time constants examined, indicating that the  
290 neural signal produced by phasic neurons is more temporally precise and  
291 distinct than that produced by tonic neurons. Phasic responses are also less  
292 sensitive to the time constant used, showing high discriminability at both  
293 short and long time constants, in contrast to tonic responses, which show  
294 much steeper drop-offs on either side of their ideal time constant.

295       *Rate-based coding.* A rate-based code uses the average firing rate  
296 across a stimulus to encode identity. The precise timing of spikes matters  
297 less than the total excitation of the neuron across a given period of time.  
298 Two of the most widely applied rate-based decoding methods in sensory  
299 neuroscience are mutual information and selectivity, and these are the  
300 metrics we use in this study to assess the decodability of neural simulations.  
301 Selectivity measures the tendency of a neuron to respond robustly only to a  
302 small subset of all stimuli. Mutual information measures the ability of a  
303 neuron to convey information about the identity of multiple stimuli by

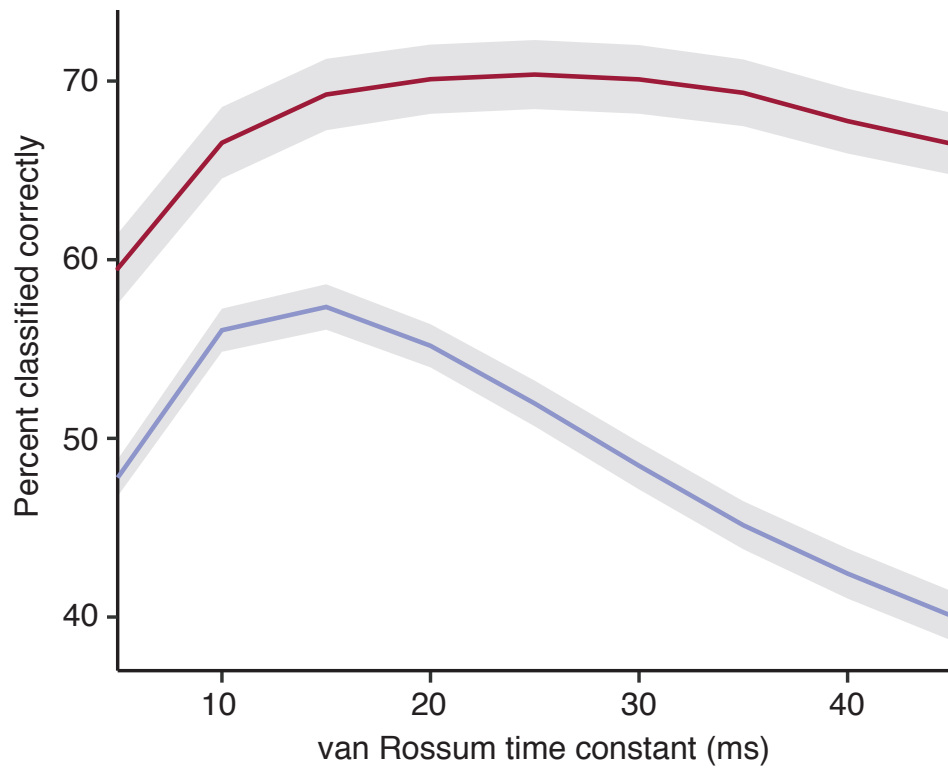

Figure 3: Classification analysis of temporal coding. The classification accuracy of the phasic models (red line) is significantly higher than the tonic models (blue line) at all time constants considered (5-45ms). Classification accuracy is based on a  $k$ -means clustering analysis of the van Rossum distances between each simulated spike train of a given neuron model. Gray ribbons show the standard error.

304 using different firing rates to encode different stimuli. There are two  
305 components of mutual information: the response (total) entropy, which  
306 represents how much information the neuron can carry based on its range  
307 of firing rates, and noise entropy, which represents how much information is  
308 lost due to the variability of a neurons firing-rate response within a  
309 stimulus. A neuron with high mutual information will have high response  
310 entropy and low noise entropy.

311 In our mutual information (MI) analysis, phasic neuron models  
312 showed a higher decodability than their tonic counterparts (paired *t*-test;  
313  $p < 1e - 6$ ). Phasic neurons had a mean MI of 1.636 bits of information,  
314 and tonic neurons had a mean MI of 1.414 bits. The difference in MI is due  
315 to a reduction in noise entropy in the phasic models relative to the tonic  
316 models (phasic: 1.083 bits; tonic: 1.517 bits; paired *t*-test,  $p < 1e - 15$ ).  
317 The response entropy is, in fact, slightly higher in the tonic models (tonic:  
318 2.932 bits; phasic: 2.720 bits; paired *t*-test,  $p = 0.0003$ ), but the large  
319 amount of noise entropy in the tonic signal more than cancels out that  
320 advantage (Figure 4).

321 The selectivity analysis shows a similar advantage for phasic model  
322 neurons (Figure 5). Phasic models are able to encode song with a higher  
323 degree of selectivity than tonic models (tonic: 0.170; phasic: 0.258; paired  
324 *t*-test:  $p < 1e - 5$ ) with some phasic models showing very high levels of  
325 selectivity (0.60 and 0.78).

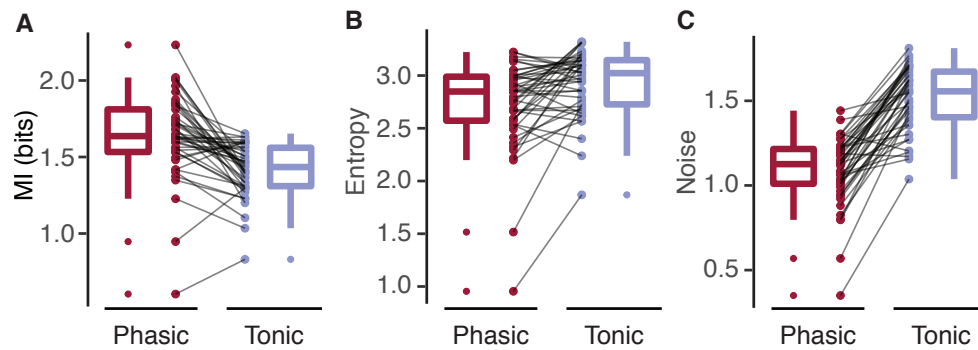

Figure 4: Mutual information analysis. **A**, Phasic models (red) have higher mutual information between firing rate and syllable identity than tonic models (blue) based on a paired  $t$ -test ( $p < 1e-6$ ). **B**, One component of mutual information is response (total) entropy which represents the maximum information capacity of the model. Phasic and tonic models have comparable response entropy, though tonic models have a slight advantage ( $p = 0.0003$ ). **C**, The second component of mutual information is noise entropy, which represents variability between repeated trials and decreases the amount of information conveyed from the theoretical maximum. Phasic models have much lower noise entropy than tonic models ( $p < 1e-15$ ) which accounts for their higher mutual information.

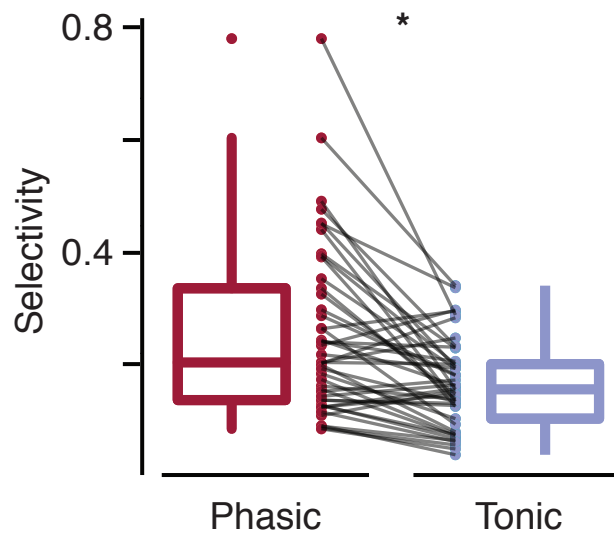

Figure 5: Selectivity analysis. **A**, Selectivity measures the tendency of a neuron to respond robustly only to a small subset of all stimuli. Phasic models (red) have the potential for higher levels of selectivity than tonic models (blue), with some phasic models showing very high levels of selectivity ( $p < 1e - 5$ ).

## 326 **Relationship between decoding measures**

327 Measures of mutual information (MI) and classification accuracy based on  
328 the van Rossum distance are positively correlated. This is because these  
329 two measures address similar decoding strategies on different timescales; as  
330 the time constant of the van Rossum distance increases, the analysis  
331 approaches a rate-based analysis.

332 The relationship between the two rate-based measures used in this  
333 study, MI and selectivity, is more complex. There is a general negative  
334 correlation (Figure 6A) between the two measures, but there are also  
335 models that score low on both measures. The models with low decodability  
336 on both measures are overwhelmingly tonic, but there are no models with  
337 high decodability on both measures, indicating that these measures are  
338 different yet mutually exclusive. This is consistent with extracellular data  
339 from zebra finch CM [37] when the same analyses were applied (Figure 6B).  
340 This relationship between MI and selectivity has also been previously been  
341 shown in starling CM [26].

## 342 **Overall responsiveness mediates decoding strategy**

343 When considering only the phasic models, the negative correlation between  
344 MI and selectivity becomes more pronounced. The overall responsiveness of  
345 the model, which we define as the average spiking rate (in Hz) of the model  
346 over the entire stimulus set, is a strong predictor of whether a model is

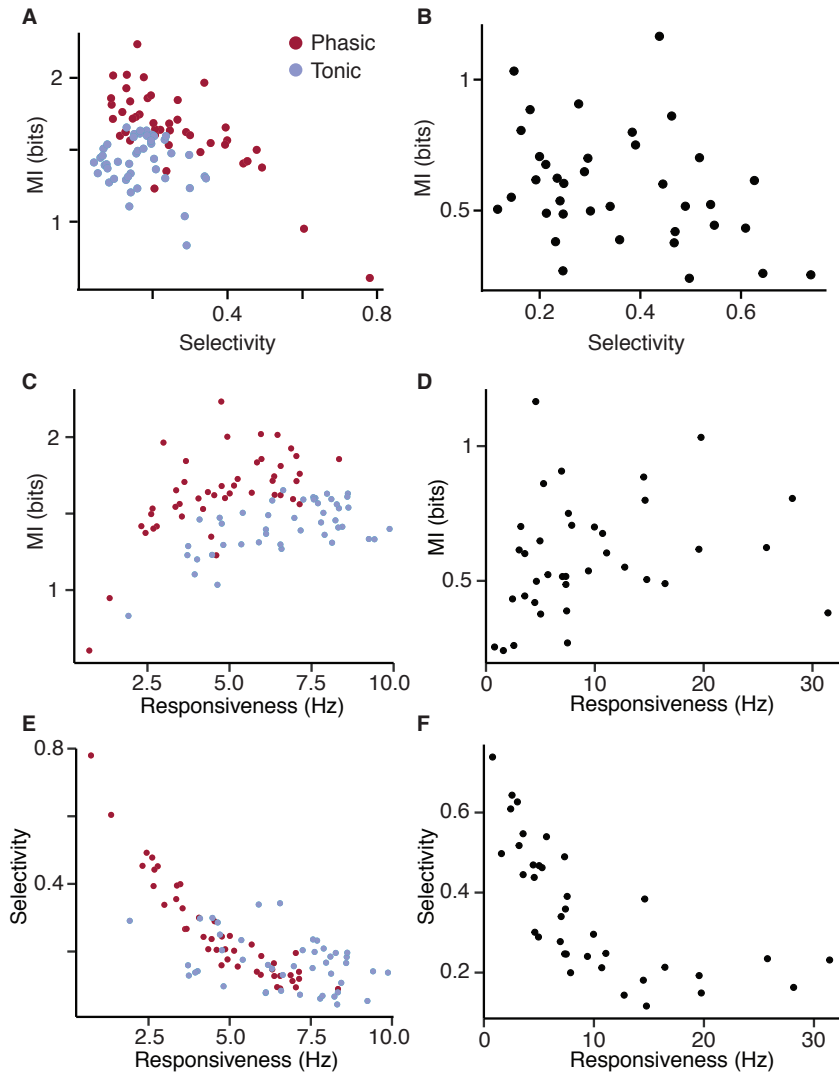

Figure 6: Relationship between MI and selectivity is mediated by responsiveness. **A**, MI and selectivity are inversely related, especially among phasic models (red). Tonic models (blue) tend to rate poorly on both decoding measures. **B**, CM neurons of zebra finches recorded extracellularly show a similar pattern of inverse correlation between MI and selectivity. **C**, Responsiveness is defined as the average response rate of the model to the entire stimulus set in spikes/sec. MI is positively correlated with responsiveness, and the groups of phasic and tonic models are clearly separable along these dimensions. **D**, CM neurons show a similar positive relationship between MI and responsiveness. **E**, Selectivity and responsiveness are negatively correlated in a non-linear fashion. **F**, CM neurons show the same non-linear correlation between selectivity and responsiveness.

347 likely to have high MI or high selectivity. MI is positively correlated with  
348 responsiveness, *i.e.* models with higher responsiveness also tend to have  
349 higher MI (Figure 6C). Similarly, selectivity is negatively correlated with  
350 responsiveness with the most selective models showing very low average  
351 firing rates (Figure 6E). The relationships between these measures in the  
352 extracellular neural data are very consistent with the predictions of the  
353 simulations, indicating that the model is capturing population-level  
354 behavior of zebra finch CM (Figure 6D,F).

355       Figure 7 shows the pairs of phasic and tonic simulations with arrows  
356 indicating the phasic part of each pair. Consistent with previous results  
357 that show that MI and selectivity are negatively correlated, phasic models  
358 tend to increase in decodability relative to the tonic pairs in only one of the  
359 two dimensions of MI and selectivity. The direction of increase is  
360 determined by the responsiveness of the phasic model. Phasic models with  
361 high responsiveness show an increase in MI but not selectivity as compared  
362 with the tonic pair; phasic models with low responsiveness show an increase  
363 in selectivity but not MI. This relationship is independent of the MI,  
364 selectivity, or responsiveness of the tonic model.

## 365 **Phasicness as slope detection**

366 Because the tonic models are not predictive of whether the phasic models  
367 will show increased MI or increased selectivity, we examined the details of  
368 the simulations that gave rise to different outcomes. Figure 8 shows two



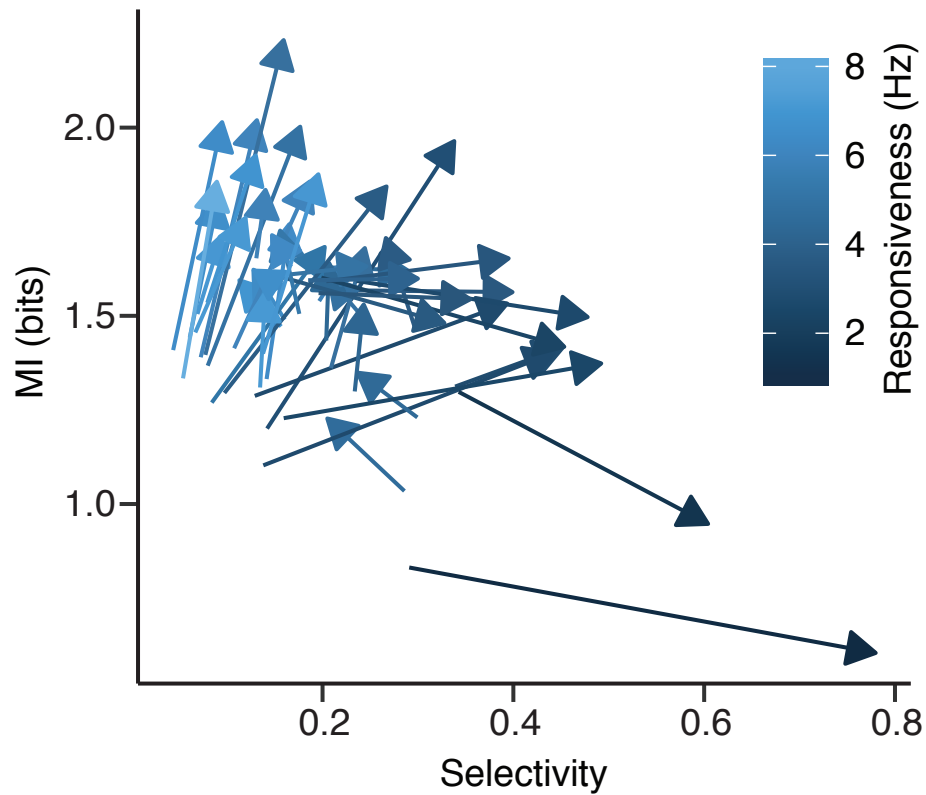

Figure 7: Phasic models increase in either MI or selectivity relative to tonic models. Connecting phasic and tonic pairs (arrows pointing toward the phasic model) shows that the phasic models tend to increase in decodability along only one of the two decoding measures examined here. The location of the tonic model on the measures of MI and selectivity does not seem to determine whether the phasic model will increase in MI or selectivity, but the responsiveness of the phasic model (arrow color) is strongly related. Phasic models with low responsiveness tend to increase in selectivity but not MI relative to tonic models. Phasic models with high responsiveness tend to increase in MI but not selectivity.

369 pairs of examples that led to different outcomes. In Figure 8A, the tonic  
370 model has MI of 1.60 bits and selectivity of 0.20; the phasic model has  
371 similar MI (1.42 bits) but selectivity increases to 0.45. In Figure 8B, the  
372 tonic model has MI of 1.39 bits and selectivity of 0.07; the phasic model's  
373 selectivity remains similar (0.13) but the MI increases (2.02). The example  
374 convolutions in Figure 8 show why this happens.

375 In Figure 8A, the phasic model responds only to parts of the  
376 convolution where the slope increases sharply. This is true not only of the  
377 upslope of a peak but also the return to baseline of a negative deflection  
378 (black arrow). Because these slope increases are relatively infrequent in this  
379 convolution, the phasic model spikes sparsely and therefore shows increased  
380 selectivity. The tonic model, on the other hand, responds to the absolute  
381 excitation of the signal, treating the sharp peaks and the slower increases of  
382 excitation similarly, and this results in broad firing across many of the  
383 syllables of the song, reducing the model's selectivity.

384 In Figure 8B, the convolution contains primarily peaks and not the  
385 slow increases in excitation present in Figure 8A. This results in the two  
386 models responding similarly to the convolution with the exception of the  
387 increased variability of the tonic model as expected from the much higher  
388 noise entropy present in the tonic models. In this case, the phasic model  
389 acts solely as a noise reducer, thus increasing the MI of its response with  
390 only a slight increase in selectivity.

391 Ultimately, these simulations point to phasic and tonic neurons

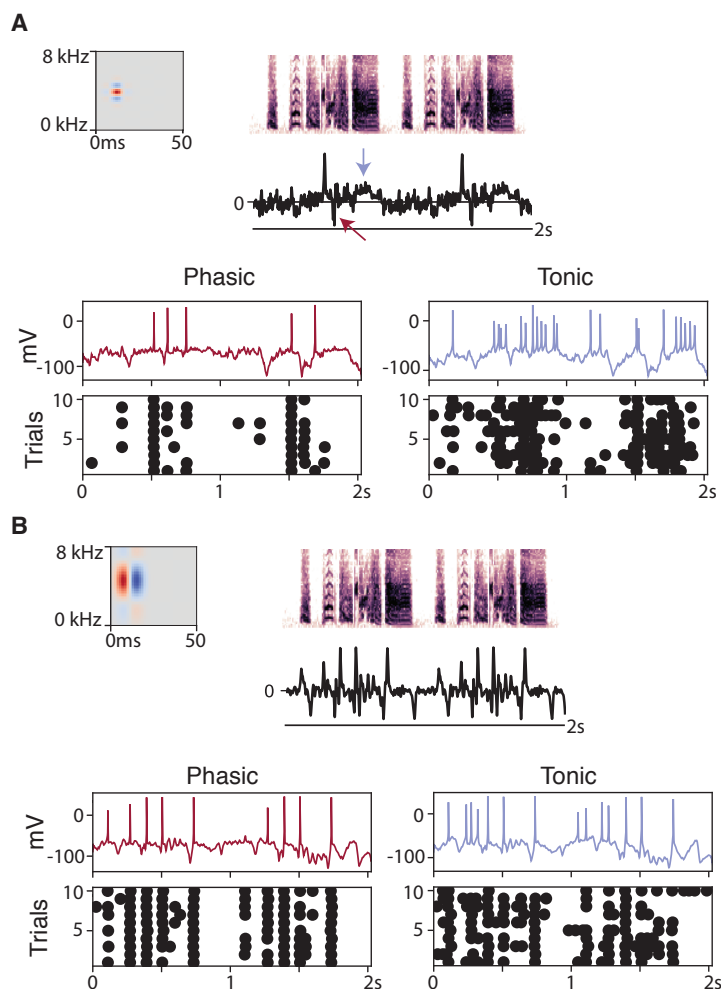

Figure 8: Examples of phasic responses with high selectivity or MI. **A**, A simulated neural response in which the phasic response had higher selectivity (0.45) than the tonic response (0.20). Upper panels show the RF, stimulus spectrogram, and convolution. Middle panels show simulated voltage traces (red: phasic; blue: tonic) and the bottom panels show the spike times across 10 trials of the stimulus. The phasic model responded only to sharp upward deflections of the convolution, including a rebound to baseline from a negative deflection (red arrow). The tonic model responded to all increases in excitation including the slow increases that the phasic model did not respond to (blue arrow). The sparseness of the phasic response boosts selectivity. **B**, A simulated neural response in which the phasic response had higher MI (2.02 bits) than the tonic response (1.39 bits). The phasic and tonic models responded at similar times but the increased temporal precision and decreased variance in spike number increased the MI of the phasic response relative to the tonic.

392 responding to fundamentally different features of the signal they receive  
393 from upstream neurons. Tonic neurons respond primarily to the level of  
394 excitation present in the signal whereas phasic neurons respond to the rate  
395 of increase of the excitation. The role of phasic neurons as a slope detector  
396 has been shown before, both *in vivo* and *in silico* [39], but these simulations  
397 suggest a potential function of that slope-detection property. By  
398 responding to the slope rather than the absolute level of excitation, phasic  
399 neurons can create selectivity from a signal that is otherwise non-selective,  
400 as Figure 8A demonstrates.

## 401 Discussion

402 Chen and Meliza (2017) [28] found that tonic and phasic neurons differ in  
403 their response to high-frequency stimulation as measured by the coherence  
404 of their firing to a complex current injection. Phasic neurons were able to  
405 follow frequencies up to 30Hz, while tonic neurons had difficulty above  
406 10Hz. They also found that the neuron model used in this simulation  
407 produces similar differences in coherence between phasic and tonic models.  
408 The ability of phasic neurons to follow higher frequencies may be important  
409 to their role in slope detection. Smoothing one of the convolutions used in  
410 this simulation with a 10Hz running average filter eliminates the sharpest  
411 peaks in the signal, but a 30Hz running average preserves them  
412 (Figure 9A). Differencing the 30Hz running average shows that smoothing

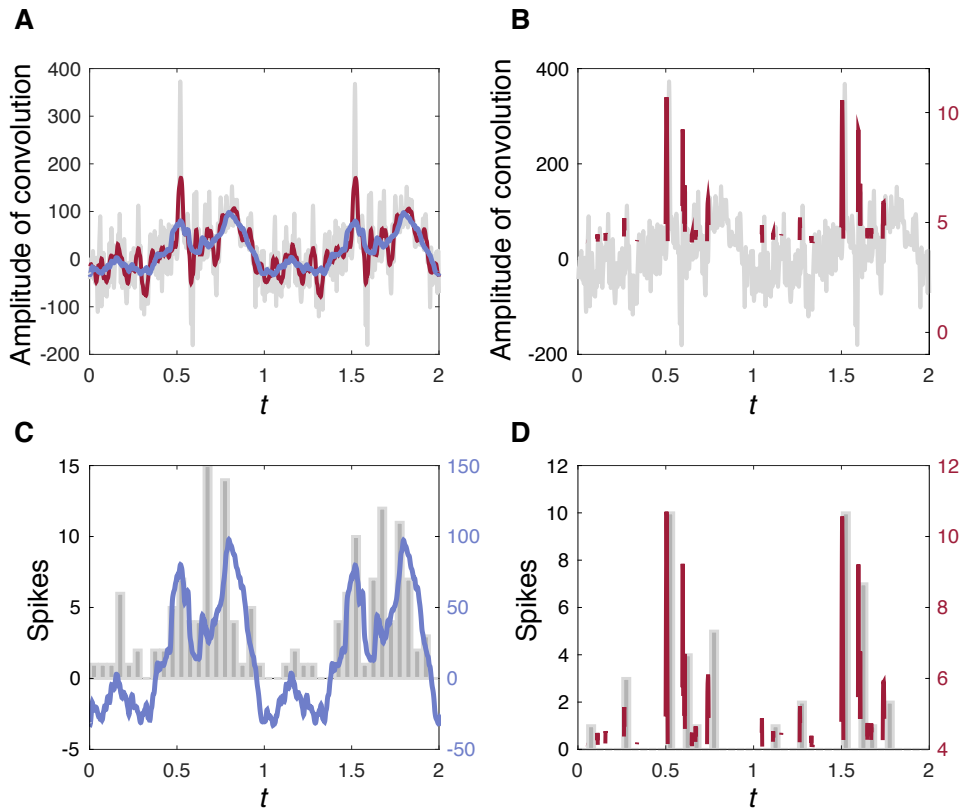

Figure 9: Simple transformations of the convolution predict phasic and tonic responses. **A**, Convolution smoothed with a 10Hz running average (blue) and 30Hz running average (red) based on the frequencies that tonic and phasic neurons are able to follow. 10Hz smooths out the majority of the peaks, but 30Hz preserves the largest ones. **B**, Differenced 30Hz smoothed convolution with a threshold of 1.5 standard deviations highlights the largest upward deflections in the signal. **C**, 10Hz smoothed convolution matches closely the spike-time histogram of the tonic model's response to this convolution (gray bars). **D**, Differenced 30Hz smoothed convolution predicts very accurately the spike-time histogram of the phasic model's response to this convolution (gray bars).

413 at that frequency preserves the most important signal deflections  
414 (Figure 9B), while the 10Hz running average removes them. In fact, the  
415 convolution smoothed with the 10Hz running average fits very well to the  
416 spike-time histogram of the tonic model's response to that convolution  
417 (Figure 9C), and the differenced 30Hz running average is highly predictive  
418 of the spike times of the phasic model (Figure 9D). The higher peak  
419 coherence of the phasic neurons may be an important part of their  
420 enhanced ability to produce a selective response to song.

## 421 **Limitations of this model**

422 There are a number of limitations of this model to keep in mind when  
423 interpreting these results. The first is that the neuron model used is not  
424 specifically a model of a CM neuron but rather a model that reproduces  
425 many of the behaviors seen in CM neurons (*e.g.*, response to current steps  
426 and coherence to chaotic currents). This model also does not consider a  
427 third type of putatively excitatory neuron found in CM, called an  
428 intermediate-spiking neuron which shows firing patterns between those of  
429 phasic and tonic neurons [28], because we could not arrive at a stable  
430 model of this type of neuron using the Rothman-Manis base model.

431 As described in the methods, the receptive fields used in this analysis  
432 were based on a thorough characterization of Field L receptive fields by  
433 Woolley *et al.* (2009) [32]. We felt that this was a reasonable approach  
434 given that CM is immediately downstream of Field L and that no such

435 comprehensive characterization has been done for CM receptive fields. This  
436 is in part due to the fact that receptive fields for CM are difficult to  
437 estimate due to the sparseness of the neurons' firing. We also do not know  
438 whether phasic and tonic neurons have a similar distribution of receptive  
439 fields. Given the differences in dendritic morphology reported by Chen and  
440 Meliza (2017) [28], it is possible that phasic and tonic neurons have  
441 systematic differences in their receptive fields. This simulation examined  
442 the effect of changing the neural dynamics of a model while keeping the  
443 receptive field constant, but that comparison might not completely capture  
444 the differences.

445 This is also a very simple, single-neuron model that lacks lateral  
446 connections or feed-forward inhibitory inputs. The auditory system, of  
447 course, is much more complex, and there are certainly many additional  
448 influences on the behavior of a neuron. It was not our intent to capture all  
449 of these complexities in our model, and in fact, the ability of our model to  
450 produce selective responses to song syllables despite its simplicity is a  
451 strength. There may be other ways to arrive at selectivity, but the fact that  
452 selectivity can be created merely by the introduction of phasic neurons into  
453 the population may explain, at least in part, the increase in selectivity from  
454 Field L to CM [23].

## 455 **Conclusions**

456 A biophysical neuron model can reproduce the relationship between mutual  
457 information and selectivity seen in zebra finch CM. The model predicts that  
458 a decrease in the overall responsiveness of the neuron shifts decoding  
459 performance toward selectivity and away from mutual information, and  
460 that prediction is supported by evidence from extracellular measurements  
461 of CM neurons. The results suggest that phasic neurons represent an  
462 advantage for the decoding of stimulus identity and that advantage is due  
463 to the precision and selectivity generated by their sensitivity to the rate of  
464 increase of excitation. The addition of phasic neurons to the CM  
465 population should improve the ability of CM to identify stimuli beyond  
466 what tonic neurons could do alone owing to their heightened selectivity and  
467 their tolerance to noise.

## 468 **References**

- 469 [1] B M Clopton, J A Winfield, and F J Flammino. Tonotopic  
470 organization: review and analysis. *Brain research*, 76(1):1–20, August  
471 1974.
- 472 [2] Ling-yun Li, Xu-ying Ji, Feixue Liang, Ya-tang Li, Zhongju Xiao,  
473 Huizhong W Tao, and Li I Zhang. A feedforward inhibitory circuit  
474 mediates lateral refinement of sensory representation in upper layer



- 475 2/3 of mouse primary auditory cortex. *The Journal of Neuroscience*,  
476 34(41):13670–13683, October 2014.
- 477 [3] Paul V Watkins, Joseph P Y Kao, and Patrick O Kanold. Spatial  
478 pattern of intra-laminar connectivity in supragranular mouse auditory  
479 cortex. *Frontiers in neural circuits*, 8(e1002161):15, 2014.
- 480 [4] Frédéric E Theunissen and Sarita S Shaevitz. Auditory processing of  
481 vocal sounds in birds. *Current opinion in neurobiology*, 16(4):400–407,  
482 August 2006.
- 483 [5] A J Doupe and P K Kuhl. Birdsong and human speech: common  
484 themes and mechanisms. *Annual review of neuroscience*, 22:567–631,  
485 1999.
- 486 [6] Olga Fehér, Haibin Wang, Sigal Saar, Partha P Mitra, and Ofer  
487 Tchernichovski. De novo establishment of wild-type song culture in the  
488 zebra finch. *Nature*, 459(7246):564–568, May 2009.
- 489 [7] N S Clayton. The Effects of Cross-Fostering On Selective Song  
490 Learning in Estrildid Finches. *Behaviour*, 109(3):163–174, January  
491 1989.
- 492 [8] Dan H Sanes and Sarah M N Woolley. A behavioral framework to  
493 guide research on central auditory development and plasticity. *Neuron*,  
494 72(6):912–929, December 2011.

- 495 [9] A E Jones, C ten Cate, and P J B Slater. Early experience and  
496 plasticity of song in adult male zebra finches (*Taeniopygia guttata*).  
497 *Journal of Comparative Psychology*, 1996.
- 498 [10] Mountjoy James D and Robert E Lemon. Extended song learning in  
499 wild European starlings. *Animal behaviour*, 49(2):357–366, February  
500 1995.
- 501 [11] Kai Lu and David S Vicario. Statistical learning of recurring sound  
502 patterns encodes auditory objects in songbird forebrain. *Proceedings of*  
503 *the National Academy of Sciences of the United States of America*,  
504 111(40):14553–14558, October 2014.
- 505 [12] C B Sturdy, L S Phillmore, J L Price, and R G Weisman. Song-note  
506 discriminations in zebra finches (*Taeniopygia guttata*): Categories and  
507 pseudocategories. *Journal of Comparative Psychology*, 1999.
- 508 [13] Keith R Kluender, Andrew J Lotto, Lori L Holt, and Suzi L Bloedel.  
509 Role of experience for language-specific functional mappings of vowel  
510 sounds. *The Journal of the Acoustical Society of America*,  
511 104(6):3568–3582, November 1998.
- 512 [14] Sarah M N Woolley, Mark E Hauber, and Frédéric E Theunissen.  
513 Developmental experience alters information coding in auditory  
514 midbrain and forebrain neurons. *Developmental Neurobiology*,  
515 70(4):235–252, March 2010.

- 516 [15] Sarah M N Woolley and Christine V Portfors. Conserved mechanisms  
517 of vocalization coding in mammalian and songbird auditory midbrain.  
518 *Hearing research*, 305:45–56, November 2013.
- 519 [16] Jennifer Dugas-Ford, Joanna J Rowell, and Clifton W Ragsdale.  
520 Cell-type homologies and the origins of the neocortex. *Proceedings of*  
521 *the National Academy of Sciences of the United States of America*,  
522 109(42):16974–16979, October 2012.
- 523 [17] Yuan Wang, Agnieszka Brzozowska-Prechtel, and Harvey J Karten.  
524 Laminar and columnar auditory cortex in avian brain. *Proceedings of*  
525 *the National Academy of Sciences of the United States of America*,  
526 107(28):12676–12681, July 2010.
- 527 [18] Sarah M N Woolley and John H Casseday. Response properties of  
528 single neurons in the zebra finch auditory midbrain: response patterns,  
529 frequency coding, intensity coding, and spike latencies. *Journal of*  
530 *Neurophysiology*, 91(1):136–151, January 2004.
- 531 [19] Julie A Grace, Noopur Amin, Nandini C Singh, and Frédéric E  
532 Theunissen. Selectivity for conspecific song in the zebra finch auditory  
533 forebrain. *Journal of Neurophysiology*, 89(1):472–487, January 2003.
- 534 [20] Anne Hsu, Sarah M N Woolley, Thane E Fremouw, and Frédéric E  
535 Theunissen. Modulation power and phase spectrum of natural sounds

- 536 enhance neural encoding performed by single auditory neurons. *The*  
537 *Journal of Neuroscience*, 24(41):9201–9211, October 2004.
- 538 [21] Jose A Garcia-Lazaro, Bashir Ahmed, and Jan W H Schnupp.  
539 Emergence of tuning to natural stimulus statistics along the central  
540 auditory pathway. *PloS one*, 6(8):e22584, 2011.
- 541 [22] G E Vates, B M Broome, C V Mello, and F Nottebohm. Auditory  
542 pathways of caudal telencephalon and their relation to the song system  
543 of adult male zebra finches. *The Journal of comparative neurology*,  
544 366(4):613–642, March 1996.
- 545 [23] Ana Calabrese and Sarah M N Woolley. Coding principles of the  
546 canonical cortical microcircuit in the avian brain. *Proceedings of the*  
547 *National Academy of Sciences*, 112(11):3517–3522, March 2015.
- 548 [24] Nienke J Terpstra, Johan J Bolhuis, and Ardie M den Boer-Visser. An  
549 analysis of the neural representation of birdsong memory. *The Journal*  
550 *of Neuroscience*, 24(21):4971–4977, May 2004.
- 551 [25] Mimi L Phan, Carolyn L Pytte, and David S Vicario. Early auditory  
552 experience generates long-lasting memories that may subserve vocal  
553 learning in songbirds. *Proceedings of the National Academy of*  
554 *Sciences*, 103(4):1088–1093, January 2006.
- 555 [26] James M Jeanne, Jason V Thompson, Tatyana O Sharpee, and  
556 Timothy Q Gentner. Emergence of learned categorical representations

- 557 within an auditory forebrain circuit. *The Journal of Neuroscience*,  
558 31(7):2595–2606, February 2011.
- 559 [27] C Daniel Meliza and Daniel Margoliash. Emergence of selectivity and  
560 tolerance in the avian auditory cortex. *The Journal of Neuroscience*,  
561 32(43):15158–15168, October 2012.
- 562 [28] Andrew N Chen and C Daniel Meliza. Phasic and Tonic Cell Types in  
563 the Zebra Finch Auditory Caudal Mesopallium. *Journal of*  
564 *Neurophysiology*, page jn.00694.2017, December 2017.
- 565 [29] Stefan Huggerberger, Marianne Vater, and Rudolf A Deisz.  
566 Interlaminar differences of intrinsic properties of pyramidal neurons in  
567 the auditory cortex of mice. *Cerebral cortex (New York, N.Y. : 1991)*,  
568 19(5):1008–1018, May 2009.
- 569 [30] C E Carr and D Soares. Evolutionary convergence and shared  
570 computational principles in the auditory system. *Brain, behavior and*  
571 *evolution*, 59(5-6):294–311, 2002.
- 572 [31] Jason S Rothman and Paul B Manis. The roles potassium currents  
573 play in regulating the electrical activity of ventral cochlear nucleus  
574 neurons. *Journal of Neurophysiology*, 89(6):3097–3113, June 2003.
- 575 [32] Sarah M N Woolley, Patrick R Gill, Thane Fremouw, and Frédéric E  
576 Theunissen. Functional Groups in the Avian Auditory System. *The*  
577 *Journal of Neuroscience*, 29(9):2780–2793, March 2009.

- 578 [33] Nandini C Singh and Frédéric E Theunissen. Modulation spectra of  
579 natural sounds and ethological theories of auditory processing. *The*  
580 *Journal of the Acoustical Society of America*, 114(6 Pt 1):3394–3411,  
581 December 2003.
- 582 [34] M C van Rossum. A novel spike distance. *Neural computation*,  
583 13(4):751–763, April 2001.
- 584 [35] David M Schneider and Sarah M N Woolley. Discrimination of  
585 communication vocalizations by single neurons and groups of neurons  
586 in the auditory midbrain. *Journal of Neurophysiology*,  
587 103(6):3248–3265, June 2010.
- 588 [36] E T Rolls and M J Tovee. Sparseness of the neuronal representation of  
589 stimuli in the primate temporal visual cortex. *Journal of*  
590 *Neurophysiology*, 73(2):713–726, February 1995.
- 591 [37] Frederic E Theunissen, Patrick Gill, Amin Noopur, Junli Zhang, Sarah  
592 M N Woolley, and Thane Fremouw. Single-unit recordings from  
593 multiple auditory areas in male zebra finches. *CRCNS.org*, 2011.
- 594 [38] Patrick Gill, Junli Zhang, Sarah M N Woolley, Thane Fremouw, and  
595 Frédéric E Theunissen. Sound representation methods for  
596 spectro-temporal receptive field estimation. *Journal of computational*  
597 *neuroscience*, 21(1):5–20, August 2006.

- 598 [39] Yan Gai, Brent Doiron, Vibhakar Kotak, and John Rinzel. Noise-gated  
599 encoding of slow inputs by auditory brain stem neurons with a  
600 low-threshold  $K^+$  current. *Journal of Neurophysiology*,  
601 102(6):3447–3460, December 2009.
